1 *Escherichia coli* clonobiome: assessing the strains diversity in feces and urine by deep amplicon  
2 sequencing.

3

4 Sofiya G. Shevchenko<sup>a</sup>, Matthew Radey<sup>a</sup>, Veronika Tchesnokova<sup>a</sup>, Dagmara Kisiela<sup>a</sup>, Evgeni V.  
5 Sokurenko<sup>a#</sup>

6

7 <sup>a</sup>Department of Microbiology, University of Washington, Seattle, WA, USA

8

9 Running Head: Deep amplicon seq for characterizing *E. coli* diversity

10

11 #Address correspondence to Evgeni V. Sokurenko, [evs@u.washington.edu](mailto:evs@u.washington.edu)

12 Present address: Evgeni V. Sokurenko, Dept. of Microbiology, University of Washington,  
13 Seattle, WA 98195-7735

14

15

16

17 Abstract word count: 232

18 Importance word count: 148

19 Article word count: 5,112

20

21

## 22 **ABSTRACT**

23 While microbiome studies have focused on diversity on the species or higher level, bacterial  
24 species in microbiomes are represented by different, often multiple strains. These strains could  
25 be clonally and phenotypically very different, making assessment of strain content vital to a full  
26 understanding of microbiome function. This is especially important with respect to antibiotic  
27 resistant strains, the clonal spread of which may be dependent on competition between them and  
28 susceptible strains from the same species. The pandemic, multi-drug resistant, and highly  
29 pathogenic *E. coli* subclone ST131-*H30* (*H30*) is of special interest, as it has already been found  
30 persisting in the gut and bladder of healthy people. In order to rapidly assess *E. coli* clonal  
31 diversity, we developed a novel method based on deep sequencing of two loci used for sequence  
32 typing, along with an algorithm for analysis of resulting data. Using this method, we assessed  
33 fecal and urinary samples from healthy women carrying *H30*, and were able to uncover  
34 considerable diversity, including strains with frequencies at <1% of the *E. coli* population. We  
35 also found that even in the absence of antibiotic use, *H30* could complete dominate the gut and,  
36 especially, urine of healthy carriers. Our study offers a novel tool for assessing a species' clonal  
37 diversity (clonobiome) within the microbiome, that could be useful in studying population  
38 structure and dynamics of multi-drug resistant and/or highly pathogenic strains in their natural  
39 environments.

## 40 **IMPORTANCE**

41 Bacterial species in the microbiome are often represented by multiple genetically and  
42 phenotypically different strains, making insight into subspecies diversity critical to a full  
43 understanding of the microbiome, especially with respect to opportunistic pathogens. However,  
44 methods allowing efficient high-throughput clonal typing are not currently available. This study  
45 combines a conventional *E. coli* typing method with deep amplicon sequencing to allow analysis  
46 of many samples concurrently. While our method was developed for *E. coli*, it may be adapted  
47 for other species, allowing for microbiome researchers to assess clonal strain diversity in natural  
48 samples. Since assessment of subspecies diversity is particularly important for understanding the  
49 spread of antibiotic resistance, we applied our method to study of a pandemic multidrug-resistant  
50 *E. coli* clone. The results we present suggest that this clone could be highly competitive in  
51 healthy carriers, and that the mechanisms of colonization by such clones need to be studied.

## 52 **INTRODUCTION**

53 Microbiomes, both in terms of function and diversity, have recently been a topic of considerable  
54 interest. The gut microbiome has gotten special attention due to its high complexity and  
55 importance to health<sup>1-9</sup>. So far, studies have almost exclusively focused on species or higher-  
56 level diversity. However, this paints an incomplete picture, since strains within the same species  
57 can be of distinct clonal origin and have vastly different metabolic, pathogenic, and antibiotic  
58 resistance profiles<sup>10-19</sup>. Importantly, multidrug-resistant bacterial strains have been found  
59 competing with commensal strains in the gut, even without antibiotic pressure<sup>18-23</sup>. Thus, there is  
60 a pressing need to identify strains in the human microbiome for species of critical health  
61 importance.

62 *Escherichia coli* is one of the most common residents of the gut. While primarily a commensal  
63 colonizer, extra-intestinal pathogenic *E. coli* clones are implicated in a variety of diseases,

64 including urinary tract infections (UTIs) - a leading cause of human antibiotic use<sup>24-28</sup>. The  
65 spread of multi-drug resistant *E. coli* is now a major health concern, especially the pandemic  
66 *fimH30* subclone of sequence type ST131 (*H30*). Though recently-emerged, *H30* is now globally  
67 distributed and comprises up to half of all urinary and bloodstream isolates of *E. coli* that are  
68 fluoroquinolone-resistant and produce extended-spectrum beta-lactamases (ESBL)<sup>29-33</sup>.  
69 Additionally, it is strongly associated with drug-bug mismatches and adverse outcomes in elderly  
70 and immunocompromised individuals<sup>31-34</sup>. Somewhat paradoxically, *H30* is also a persistent gut  
71 colonizer of healthy people and frequently causes asymptomatic bacteriuria (ABU) in such  
72 carriers<sup>35</sup>. Yet, the relative clonal predominance of *H30* strains among *E. coli* colonizing the gut  
73 or bladder in healthy carriers remains unknown. Answering these questions could have a  
74 significant impact on understanding the spread of antibiotic resistance and its reservoirs.

75 Currently, microbiome diversity is studied by sequencing the 16S rRNA gene, but this cannot  
76 capture clonal diversity<sup>36, 37</sup>. Conventional methods for assessing clonal diversity, such as  
77 metagenomic sequencing and single colony typing, are costly and labor intensive. For reliable  
78 clonal diversity analysis, metagenomic sequencing requires very high coverage per sample,  
79 while single colony typing requires handpicking large numbers of colonies for multi-locus  
80 sequence typing (MLST)<sup>38-42</sup>. In *E. coli*, MLST requires assessment of 7 genes per isolate which  
81 is analytically complex, costly, labor intensive, and therefore difficult to implement. Previously,  
82 we reported an alternative clonotyping method that requires sequencing regions of only 2 genes –  
83 *fumC* which is part of the MLST scheme and *fimH* that encodes a rapidly-evolving fimbrial  
84 adhesin<sup>43</sup>. The *fumC/fimH*-based (CH) typing of *E. coli* is widely accepted due to its simplicity  
85 and ability to not only identify specific STs but subdivide them into smaller subclones<sup>43</sup>.

86 Specifically, *H30* is identified using the allele combination *fumC40/fimH30*, while other less  
87 resistant ST131 strains have the same *fumC* but different *fimH* alleles.  
88 Here, we report a high-throughput method for clonal typing of *E. coli* strains by combining CH  
89 typing and deep amplicon sequencing. We developed a new algorithm - Population-Level Allele  
90 Profiler (PLAP) - for detecting alleles and predicting the relative prevalence of each allele in a  
91 sample. We were able to assess the prevalence of clonal groups (including *H30*) in multiple fecal  
92 and urine samples concurrently, with a limit of relative abundance detection at <1% of the total  
93 population.

## 94 **RESULTS**

### 95 **Deep amplicon sequencing of defined samples**

96 To validate our approach and establish a limit of detection for strain presence, we first tested our  
97 deep amplicon sequencing procedure on a set of defined samples. To create the defined samples,  
98 we first selected a fecal sample from our lab collection known to contain *H30* and ST101. Next,  
99 we isolated a single colony from each and confirmed them to be strains of *H30* (*fumC40/fimH30*)  
100 and ST101 (*fumC41/fimH86*) using CH typing. From these single colonies, we first created *H30*-  
101 only and ST101-only mixtures of *fumC* and *fimH* amplicons. We also created four ST101/*H30*  
102 mixed samples by combining the *fumC* and *fimH* amplicons from ST101 and *H30* in ST101:*H30*  
103 ratios of 1:1, 1:4, 1:100, and 1:1000.

104 Analysis of raw sequencing data from *H30*-only and ST101-only samples showed the average  
105 coverage of erroneous bases was 0.08%  $\pm$  0.09% for both strains. Erroneous bases were observed  
106 in both genes across most nucleotide positions. The highest coverage for an erroneous base was  
107 0.66% of aligned reads in *fumC* and 0.45% in *fimH* for *H30*, and 0.68% in *fumC* and 0.46% of

108 reads in *fimH* for ST101. The frequency distribution for erroneous base coverage is presented in  
109 Supplemental Figure 1.

110 Analysis of raw sequencing data from ST101/*H30* mixes showed that both *H30* and ST101  
111 alleles were detectable in the 1:1, 1:4, and 1:100 mixes. In the 1:1000 mix, only alleles of the  
112 dominant *H30* strain were observed. In the 1:1, 1:4, and 1:100 mixes, input and observed allele  
113 prevalence was highly correlated for both *fumC* and *fimH* ( $R^2=0.996$  and  $0.997$  respectively,  
114 Suppl. Fig. 2). Erroneous bases were observed at  $0.09\% \pm 0.1\%$  and  $0.08\% \pm 0.09\%$  of aligned  
115 reads in *fumC* and *fimH*, respectively (Suppl. Fig. 1). The highest coverage for erroneous bases  
116 among all mixes was 0.79% of aligned reads for *fumC* and 0.57% of aligned reads for *fimH*.  
117 Since 0.79% of aligned reads was the highest coverage for an erroneous base, we established  
118 0.8% as a cutoff for correct base calling in both genes. This cutoff was used for all further PLAP  
119 analysis.

## 120 **Deep sequencing of study samples and allele prediction**

121 Next, we applied PLAP to 67 participant samples (43 fecal and 24 urine) collected from a  
122 previous study<sup>35</sup>. A total of 128 *fumC* and 129 *fimH* alleles were predicted across all samples, of  
123 which 123 (96.1%) and 125 (96.9%) were previously known *fumC* and *fimH* alleles,  
124 respectively. 5 novel *fumC* and 4 novel *fimH* alleles were potentially detected. All novel *fumC*  
125 and *fimH* alleles were phylogenetically distant from other alleles predicted in the sample,  
126 indicating that these alleles are not artifacts of sequencing (Suppl. Fig. 3, 4). These novel alleles  
127 nonetheless clustered with other *E. coli* *fumC* and *fimH* alleles, indicating that these are novel *E.*  
128 *coli* alleles rather than alleles belonging to other species.

129 The average number of alleles predicted per sample was  $1.91 \pm 0.96$  for *fumC* and  $1.93 \pm 1.01$   
130 for *fimH*. 43 samples had same numbers of predicted *fumC* and *fimH* alleles; 24 samples had  
131 different numbers of predicted *fumC* and *fimH* alleles (Fig. 1). Overall, the number of predicted  
132 *fumC* alleles correlated to the number of predicted *fimH* alleles with an  $R^2$  of 0.88 (Fig. 1).

133 To assess the performance of PLAP for predicting alleles, we used samples containing criterion  
134 clones - strains previously identified by single colony typing. PLAP detected criterion *fimH* and  
135 *fumC* alleles in 52 of these samples (90%). In the 6 samples where criterion allele(s) were not  
136 found, the criterion clones were ciprofloxacin-resistant, but their isolation from the sample  
137 required  $\geq 2$  plating attempts. This leads us to believe that these alleles were not detected because  
138 they were absent in the MacConkey-plated population prior to deep sequencing.

139 A total of 72 non-criterion (previously unidentified) *fumC* and 71 non-criterion *fimH* alleles were  
140 predicted by PLAP across all 67 samples. To assess the performance of PLAP on non-criterion  
141 alleles, we analyzed 14 samples (10 fecal, 4 urine) predicted to contain 22 non-criterion *fumC*  
142 and 22 non-criterion *fimH* alleles. 12 of these samples had at least one non-criterion allele  
143 alongside criterion alleles; the remaining 2 had multiple non-criterion alleles in each gene only.  
144 For each sample  $\geq 40$  single colonies were isolated and CH type determined using 7-SNP qPCR,  
145 with each CH type verified by sequencing. With these data, we confirmed 19 (86%) predicted  
146 non-criterion alleles for each gene. This included one predicted novel *fumC* allele. Of the  
147 unconfirmed alleles, one was not distinguishable by 7-SNP qPCR and had a predicted prevalence  
148 of 1%; therefore, we did not attempt to locate it. The remaining unconfirmed alleles had  
149 predicted prevalences of  $< 3\%$  and therefore may have been missed due to insufficient sampling.  
150 Additionally, all criterion alleles in these samples, 12 per gene, were predicted by PLAP.

151 **Prediction of allele prevalence in multi-allele samples**

152 We have also designed PLAP to predict the within-sample prevalence of each allele. The average  
153 allele prevalence in fecal samples was  $47.3\% \pm 4.3\%$  SEM (range 0.88 – 100%) for *fumC* and  
154  $48.4\% \pm 4.22\%$  SEM (range 1 – 100%) in *fimH*. The average allele prevalence in urine samples  
155 was  $64.8\% \pm 6.91\%$  SEM (range 1.4 – 100%) for *fumC* and  $58.3\% \pm 7.18\%$  SEM (range 1 –  
156 100%) in *fimH*.

157 In order to verify that the prevalences predicted by PLAP were accurate, we compared  
158 predictions to actual in-sample prevalence using two different methods.

159 In the first method, we used *H30* since ascertaining its prevalence is relatively simple. By plating  
160 the sample on MacConkey agar then patching onto LB-ciprofloxacin, it is possible to compare  
161 the number of cipro-resistant (*H30*) colonies to the total number of *E. coli* colonies. The ratio of  
162 these two numbers provides the *H30* load in a sample. We compared the predicted prevalences of  
163 *fumC40* and *fimH30* to the *H30* load in 17 fecal samples containing cipro-resistant *H30*.

164 Correlations between the *H30* load and the predicted prevalence of *fumC40* and *fimH30* were  
165 0.86 and 0.84 respectively (Fig. 2), indicating that prevalences given by PLAP were  
166 representative of actual allele prevalences. To determine whether outliers were present, we  
167 calculated the 99% CI range for every sample (see Methods). Three outlier samples were  
168 identified (open circles, Fig. 2). Since it is possible that these outliers contain ciprofloxacin-  
169 sensitive non-*H30* *fimH30*-containing clones, *fumC*-null or *fimH*-null clones, and/or  
170 ciprofloxacin-sensitive *H30*, we decided to employ screening of a large number of single  
171 colonies.

172 In this second method, we used single colony typing for the in-depth characterization of 14  
173 multi-allele samples described above, alongside 4 additional single-allele samples (2 fecal, 2  
174 urine) for which only one allele per gene was predicted. This set of 18 samples included 11 of



175 the 17 fecal samples used for the *H30*-based analysis above, including one of the outlier samples.  
176 For all 18 samples, we used CH typing of  $\geq 40$  single colonies per sample to determine the  
177 prevalence of each *fumC* and *fimH* allele. Correlation between the PLAP-predicted prevalence  
178 and the experimental allele prevalence was 0.98 for both *fumC* and *fimH* alleles (Fig. 3). As in  
179 the *H30* analysis above, we determined whether outliers were present using the 99% CI range for  
180 every sample. Only one outlier was detected, corresponding to the only sample that contained  
181 colonies from which *fimH* could not be amplified (*fimH*-null colonies). Furthermore, the sample  
182 that was an outlier in the *H30*-based analysis was found to contain a relatively rare ciprofloxacin-  
183 sensitive *H30*.

#### 184 **Matching *fumC* and *fimH* alleles to predict sample strain content**

185 In CH typing, unique combinations of *fumC* and *fimH* alleles are used to determine the identities  
186 of strains in a sample. Since a strain contains one copy of *fumC* and *fimH*, the prevalences of  
187 alleles of these two genes in the sequencing data should be identical. For example, in a sample  
188 containing 30% *H30* (*fumC40/fimH30*) and 70% ST101 (*fumC41/fimH86*), we expect to see 30%  
189 of *fumC* reads to be *fumC40* and 30% of *fimH* reads to be *fimH30*. In reality, however, the  
190 prevalences will be slightly different due to PCR and sequencing errors. To establish an  
191 acceptable difference between the prevalences of same-strain *fumC* and *fimH* alleles, we looked  
192 at 11 samples containing unique CH types (i.e. without allele sharing). In these 11 samples, the  
193 predicted prevalences of *fumC* and *fimH* were highly correlated (0.99, Fig. 3). First, we  
194 calculated the absolute difference between the predicted *fumC* and *fimH* prevalence for each  
195 matched pair of alleles. Next, each absolute difference was divided by the predicted *fumC* or  
196 *fimH* prevalence to obtain a relative deviation (Fig. 4). Finally, we used the relative deviations to

197 derive an equation for the maximum acceptable difference between matching *fumC* and *fimH*  
198 alleles (Fig. 4).

199 While some samples, like those discussed above, contain only unique CH types, others contain  
200 CH types with shared alleles. For example, in a sample containing 30% *H30* and 70% *ST131*,  
201 which share *fumC40*, the prevalence of *fumC40* is not representative of either *H30* or *ST131*  
202 prevalence. For such samples, the minority rule was applied to resolve the strain content. Thus,  
203 under the minority rule, the percentage of *H30* in the example above would be determined by  
204 *fimH30*, rather than *fumC40*, since the *fimH30* prevalence is smaller. We tested this approach on  
205 both the *H30* and the 18-sample analysis described above to see if this resolved outliers. In both  
206 cases, using the minority rule removed outliers and improved the correlation between predicted  
207 and experimental prevalence (Suppl. Fig. 5). Thus, we were able to assign strain content and  
208 strain prevalence in all samples, including samples with allele sharing.

### 209 **Predicted strain diversity of fecal and urine samples**

210 Using the equation described above, we were able to classify all samples in our study into 4  
211 categories (see Fig. 5): samples with only one CH type (uniclonal); samples with multiple unique  
212 CH types (unambiguous); samples with one dominant unique CH type and multiple minor non-  
213 unique CH types (ambiguous-simple), and samples where the dominant CH type was not unique  
214 (ambiguous-complex). Fecal samples were 33% uniclonal, 23% unambiguous, 21% ambiguous-  
215 simple, and 23% ambiguous-complex. Urine samples were 54% uniclonal, 8% unambiguous,  
216 25% ambiguous-simple, and 12.5% ambiguous-complex.

217 Overall, 107 fecal and 48 urine strains were predicted, corresponding to 68 clones in fecal  
218 samples and 33 clones in urine samples. Of these clones, 50 (73.5%) and 24 (73%) were found in  
219 Enterobase, respectively.

220 Out of the 155 total strains predicted, 6 were *fumC*-null (3.9%) and 2 were *fimH*-null (1.3%).

221 This is congruent with the occurrence of null alleles in our 18-sample subset, where 1 (3%) out  
222 of 35 total strains predicted was a null-allele strain.

223 The average number of strains per sample was  $2.47 \pm 1.32$  for fecal samples and  $1.96 \pm 1.40$  for  
224 urine samples. Based on Enterobase's ST-phylogroup data, we determined that B2 was the most  
225 common (14 out of 47, 30%) among non-criterion fecal strains. Other phylogroups included A  
226 (26%), B1 (19%), C (8.5%), D (11%), E (2%), and F (4%). Non-criterion strains in urine  
227 samples included strains from phylogroups B2 (8 out of 16, 50%), B1 (19%), D (19%), A and F  
228 (6% each).

### 229 **Novel clones**

230 17 fecal samples (40%) and 8 urine samples (33%) in our study were found to contain at least  
231 one novel CH type. This included 19 fecal and 9 urine CH types not found in Enterobase. Of  
232 these, 5 fecal and 3 urine CH types included at least one novel allele, and 14 fecal and 6 urine  
233 CH types were combinations of *fumC* and *fimH* that were not previously observed (novel CH  
234 combinations). Both CH types involving novel alleles and novel CH combinations were  
235 observed to be primarily low-frequency clones. The average predicted prevalence for novel CH  
236 combinations was  $8.7\% \pm 3.5\%$  SEM (range 1-64.2%), and 13 out of 20 novel CH combinations  
237 had predicted prevalences of <5%. One such combination was confirmed in our 14 characterized

238 sample set, consisting of *fumC24* and *fimH9*, with a predicted prevalence of 1.6% and  
239 experimental prevalence of 1.2%.

240 Similarly, 7 out of 8 novel allele-containing CH types had predicted prevalences of <2%. The  
241 remaining CH type had a predicted prevalence of 70.7% and was detected using single colony  
242 typing. The novel *fumC* allele was paired with *fimH47* and was verified to be 8 SNPs away from  
243 the closest known allele. The remaining MLST gene alleles for this strain were *adk46*, *icd260*,  
244 *mdh160*, *gyrB266*, *purA1*, and *recA221*.

#### 245 **Clones below error threshold**

246 To ascertain if we could identify alleles at prevalences below our defined error threshold of  
247 0.8%, we ran PLAP on the set of 14 multi-allele samples using an error threshold of 0.5%. In 8  
248 and 6 samples, respectively, prevalence of *fumC* and *fimH* alleles was <0.8%. None of the alleles  
249 corresponded to known *fumC* or *fimH* alleles. These apparent novel alleles clustered alongside  
250 known alleles identified in the sample (Suppl. Fig. 6, 7), leading us to conclude that these arose  
251 due to sequencing or amplification error rather than belonging to clonally different strains.

#### 252 **Predicted strain diversity in urine and fecal samples**

253 Strain diversity in first fecal samples was comparable with diversity in second fecal samples  
254 (paired t-test,  $p > 0.1$ ). Distinguishing between *H30*-containing and non-*H30* samples showed that  
255 there was no statistical difference in strain diversity between *H30*-containing and non-*H30* fecal  
256 samples of either kind (unpaired t-test,  $p > 0.1$ ), and that there was no difference in diversity  
257 between first and second fecal samples in either non-*H30* or *H30*-containing samples (Fig. 6,  
258 paired t-test,  $p > 0.1$ ). Both *H30* and non-*H30* urine samples were less diverse than corresponding

259 fecal samples (paired t-test,  $p < 0.01$  and  $0.02$ , respectively). However, *H30* urine samples were  
260 less diverse than non-*H30* urine samples (t-test,  $p = 0.04$ ).

261 It is also noteworthy that in 6 out of 23 *H30*-containing fecal samples, *H30* was the only strain  
262 predicted, indicating that it may be fully dominant in the gut niche in these participants.

### 263 **Strain turnover in fecal samples**

264 There was no correlation between number of strains in the first and second fecal sample, as well  
265 as no correlation between number of strains in the urine sample and either fecal sample (Fig. 7).

266 When comparing the strain content of first and second fecal samples, we found that 92% of non-  
267 criterion strains appeared to be transient i.e. were detected in one of the fecal samples only.

268 Transient non-criterion strains were also skewed towards lower-frequency strains (t-test,  
269  $p < 0.001$ , Fig. 8B). It is possible that these strains are present in both fecal samples but are below  
270 our limit of detection in one. However, we find that in one participant (P2, Suppl. Data) the first  
271 fecal sample contains 3 ciprofloxacin-sensitive non-criterion strains while the second fecal  
272 sample contains only ciprofloxacin-resistant *H30* as verified by single colony testing. This leads  
273 us to believe that there may be significant strain turnover in our fecal samples overall.

### 274 **DISCUSSION**

275 We combined conventional *fumC/fimH* typing with deep amplicon sequencing to assess *E. coli*  
276 clonal diversity in a high-throughput manner. Our method has several advantages over existing  
277 protocols. Firstly, our method has high sequencing resolution for target species. Since we only  
278 sequence *E. coli fumC* and *fimH*, we can generate  $\geq 0.5$  million reads per sample, yielding  $\geq 5,000$   
279 reads per base. In contrast, metagenomic sequencing, which is nonspecific to target species,  
280 yields only 20 reads per base per genome (assuming a 5Mb genome). Secondly, our method

281 assessed up to 46 samples per sequencing run. In contrast, MLST requires typing  $\geq 100$  single  
282 colonies per sample to capture the low-prevalence strains that PLAP detects. Finally, while we  
283 developed PLAP for *E. coli*'s CH typing, PLAP is not limited to *E. coli* clonotyping and may be  
284 generalized to other MLST schemes.

285 Despite studies showing that the healthy gut *E. coli* population typically includes multiple  
286 clones, we show that the pandemic multidrug-resistant subclone *H30* can dominate the gut in  
287 healthy women, sometimes as the only detectable clone<sup>42, 44-48</sup>. This builds upon previous  
288 research which has found multidrug-resistant bacteria in healthy people, and healthy people who  
289 appear to harbor only one gut clone<sup>44-48</sup>. Total dominance is especially concerning since  
290 antibiotic pressure was absent, indicating that *H30* is potentially outcompeting other clones by  
291 alternative means. Whether these mechanisms are metabolic, or whether certain virulence factors  
292 give *H30* an advantage is unclear, though previous studies have speculated that some virulence  
293 factors may be beneficial for *E. coli* gut survival<sup>49</sup>. Additionally, our study involved a small  
294 number of participants in which *H30* was present in the gut and bladder. Therefore, it is possible  
295 that host differences play a significant role. Another novel observation was that *H30* was the sole  
296 detected urinary strain more frequently than other clones, regardless of *H30* gut dominance/non-  
297 dominance. This may indicate that *H30* might be an especially well-adapted uropathogen,  
298 potentially explaining its association with UTI. Since it is unknown how ABU converts to UTI,  
299 further study into *H30* dominance in both ABU and UTI are needed.

300 We also uncovered substantial diversity in our samples. This includes significant *E. coli* diversity  
301 in non-*H30* urine samples from healthy women. Reports of multi-strain bacteriuria are rare,  
302 likely due to the convention of selecting one isolate per urine sample<sup>46, 47</sup>. Therefore, it is  
303 unknown how common multi-strain bacteriuria may truly be. Remarkably, we also detected low-

304 prevalence strains in the gut, some of which were novel clones, with up to 6 clones in a single  
305 sample. Gut *E. coli* diversity of this magnitude is supported by studies typing >200 single  
306 colonies per sample<sup>42</sup>. Studies using smaller counts usually report fewer clones, indicating that  
307 there may be undescribed *E. coli* diversity when manageable numbers of colonies are used<sup>44, 45</sup>.  
308 Therefore, we believe that microbiome-like approaches to *E. coli* diversity are necessary to fully  
309 understand intra-species dynamics in both the gut and bladder.

310 Our approach does have limitations. Firstly, our lowest detectable strain prevalence is 0.8% of  
311 the *E. coli* population. This limit may be addressed in several ways including use of a high-  
312 fidelity polymerase and preferential selection of *E. coli* colonies. However, we also recognize  
313 that detection of rare strains may still prove difficult and that methods like ours may not fully  
314 replace current techniques. Secondly, our method relies on sub-culturing *E. coli*. We are aware  
315 that, theoretically, some strains could be suppressed during growth on selective media, forming  
316 no/smaller colonies and skewing prevalence results. However, we did not encounter this during  
317 our study. While amplification of *fumC* and *fimH* may be applied to urine samples without  
318 culturing, attempts at doing this directly from fecal samples were unsuccessful, possibly due to  
319 *E. coli* comprising <1% of the gut microbiome, making *E. coli* DNA too rare to effectively  
320 amplify. Therefore, we used culturing for all samples. These issues lower the reliability of our  
321 approach, but we believe that it remains an important step towards development of  
322 comprehensive clonal diversity (clonobiome) assessment tools for any species of interest.

## 323 **MATERIALS AND METHODS**

### 324 **Study design and sample processing**

325 We selected a subset of participants from a previous study carried out by Kaiser Permanente  
326 Washington and University of Washington (Seattle, WA)<sup>35</sup>. That study identified healthy gut  
327 carriers of ciprofloxacin-resistant *E. coli*, including *E. coli* H30. These *E. coli* were found in  
328 initial fecal samples by plating on LB-ciprofloxacin and CH typing of 1 to 8 single colonies.  
329 After the initial fecal sample was analyzed, H30 carriers as well as carriers of some other strains  
330 were asked to provide urine samples. These were received on average  $152 \pm 55.9$  days after the  
331 initial sample (85% responded). The respondents were then asked to provide follow-up fecal  
332 samples, which were received on average  $82 \pm 41.1$  days after the urine sample (84%  
333 responded). All fecal and urine samples were tested for ciprofloxacin-resistant *E. coli* as with  
334 initial samples. For this study, we chose 28 individuals who supplied all three samples. In 11  
335 participants, H30 was identified in all three samples; in 4 additional participants H30 was  
336 isolated in two samples. In 8 participants ciprofloxacin-resistant ST1193 was found in at least  
337 two samples. In 5 participants the same ciprofloxacin-susceptible clone was found in at least two  
338 samples. The sample types, strains clonal identity, and sampling times for all participants are  
339 shown in Supplemental Figure 8. Average age of participants was  $66.7 \pm 15.7$  years.

#### 340 **Preparation of predefined control samples**

341 For control experiments, two predefined strains were chosen - H30 (*E. coli* FESS614.ds6) and  
342 clonal group ST101 (*E. coli* FESS614.ds4). DNA from these strains was extracted and *fumC* and  
343 *fimH* was amplified by PCR using the following conditions: 3min denaturation (95°C), 35 cycles  
344 of annealing (95°C for 45sec, 57°C for 45sec, 72°C for 45sec), 5min extension (72°C), 4°C hold.  
345 The primers (10 uM) used were as follows: 5'-TCACAGGTCGCCAGCGCTTC-3' (*fumC*  
346 forward), 5'-GTACGCAGCGAAAAAGATTTC3' (*fumC* reverse), 5'-  
347 TCAGGGAACCATTCAGGCA-3' (*fimH* forward), 5'-ACAAAGGGCTAACGTGCAG-3' (*fimH*



348 reverse). Amount of PCR product was measured by Qbit. To create *H30*-only and *ST101*-only  
349 samples, the corresponding *fumC* and *fimH* PCR products were pooled together at a 1:1 ratio. To  
350 create mixes, *H30* and *ST101* amplicons of *fumC* were mixed together in *ST101:H30* ratios of  
351 1:1, 1:4, 1:10, 1:100, and 1:1000. The same was performed with *fimH* amplicons. The *fumC* and  
352 *fimH* mixes were then pooled together by ratio type to create mixes that had equal concentrations  
353 of total *fumC* and *fimH*. The DNA mixes were prepared for sequencing using Nextera XT DNA  
354 library prep kit using standard protocol. The resulting library was sequenced on the Illumina  
355 MiSeq (v3 kit). All mixes, except 1:10, reached coverage of  $\geq 9,000X$  and were analyzed.

### 356 **Deep sequencing and allele analysis of the fecal and urine samples**

357 Each fecal and urine sample was plated on MacConkey agar to reach  $\sim 1,000$  *E. coli* single  
358 colonies per plate. All colonies were swabbed from the agar and DNA extracted using the  
359 Qiagen Blood & Tissue Kit. From this pooled DNA *fumC* and *fimH* genes were amplified by  
360 PCR by using the same primers and conditions as described above for control samples.  
361 Amplicons were then purified and pooled by sample using the Qiagen Gel Extraction kit, then  
362 prepared for sequencing using Nextera XT DNA library prep kit using standard protocol except  
363 for usage of 52.5ul of RSB in the final magnetic bead cleanup step. The resulting library was  
364 sequenced on the Illumina MiSeq (v3 kit). Sequencing data was analyzed using a Python  
365 program of our construction, Population-Level Allele Profiler (PLAP), and has been made  
366 available for public use on GitHub: [github.com/marade/PLAP](https://github.com/marade/PLAP). The process is described below  
367 (see also Suppl. Fig. 9).

368 For each sample, adapter sequences were removed using Trim-Galore, and resulting trimmed  
369 reads were aligned to a list of all known *fumC* and *fimH* alleles using KMA with strict 99.99%  
370 identity matching<sup>50,51</sup>. For each KMA-detected allele per sample, trimmed reads were again

371 aligned to the sequence using Minimap2 and SAMtools<sup>52, 53</sup>. Any candidate allele which had at  
372 least 1 base supported by <0.8% of reads was removed from consideration. False positives were  
373 filtered using a moving 10bp window for each allele as follows. Reads of  $\geq 100$ bp with 100%  
374 identity within the window were counted. Alleles with low initial coverage, unstable coverage  
375 (high average deviation from the mean), and high similarity in coverage pattern to an allele with  
376 more stable coverage were removed from consideration. If >3 alleles were left for consideration  
377 for a gene, 10bp moving window analysis was repeated with  $\geq 200$ bp reads. If for any interval in  
378 this second analysis, >60% of coverage was lost compared to the first moving window coverage,  
379 the allele was discarded. Heterogeneity at any positions that remained undescribed by surviving  
380 alleles was recorded. Relative abundance of all alleles was determined using the minimum  
381 coverage found during first moving window analysis. In samples found by PLAP to be  $\geq 50\%$   
382 made up of <100bp reads (overtagged samples), allele prevalence was calculated manually  
383 by ascertaining base(s) unique to each allele and using the coverage of these base(s) to calculate  
384 prevalence.

385 Out of the 28 total sets of fecal and urine samples chosen for this study, at least one sample failed  
386 PCR amplification or sequencing library prep in 4 sets and therefore all samples from these sets  
387 were dropped. From the remaining 24 sets we were able to sequence *fumC* and *fimH* in all three  
388 samples. Out of those, 67 (89%) samples – 22 first fecal, 24 urine, and 21 second fecal – reached  
389  $\geq 9,000$ X coverage per gene and were included in the analysis.

### 390 **Determining within-sample clonal group breakdown**

391 Identity of strains present in a sample was determined by combining *fumC* and *fimH* allele  
392 numbers and determining the ST type using Enterobase. In uniclonal and unambiguous samples,  
393 every allele had one match supported by the equation for maximum acceptable difference

394 between same-strain *fumC* and *fimH*. Therefore, these alleles formed a CH type based on which  
395 ST type was determined.

396 For ambiguous-simple samples, the most prevalent *fumC* and *fimH* alleles formed an equation-  
397 supported CH type. Any alleles that also had a single equation-supported match were assigned to  
398 form a CH type. For all other alleles, Enterobase was consulted to determine which allele  
399 combinations have been observed. If the CH type(s) produced was between alleles that had  
400 different prevalences according to the equation, the “remaining” prevalence was calculated for  
401 the allele with the greater prevalence. This allele was then paired with allele(s) for which an  
402 Enterobase-logged CH type was not available and/or any novel alleles until the “remaining”  
403 prevalence was consumed. If there were any allele(s) that remained after this step, they were  
404 paired with the major allele of the opposite gene.

405 For ambiguous-complex samples, the most prevalent *fumC* and most prevalent *fimH* allele were  
406 assigned to the same CH type. The “remaining” prevalence was calculated for the allele with the  
407 greater prevalence and treated as an unmatched allele. From this step, we proceeded as with  
408 ambiguous-simple samples.

#### 409 **Determining prevalence of clonal groups by culturing**

410 Prevalence of ciprofloxacin-resistant clones in each sample was determined by diluting ~1ul of  
411 sample with  $\geq 300$ ul of H<sub>2</sub>O, plating 40ul of this dilution on MacConkey agar, picking >130  
412 single *E. coli* colonies, patching on Hardy-Chrom UTI agar to verify *E. coli* identity, then  
413 patching colonies on LB-ciprofloxacin. Prevalence of other clonal groups was validated by  
414 plating on MacConkey agar and subsequent patching of single colonies onto Hardy-Chrom UTI

415 agar to distinguish *E. coli. fumC* and *fimH* alleles of these colonies were then determined by 7-  
416 SNP clonotyping and Sanger sequencing<sup>54</sup>.

#### 417 **Statistical and phylogenetic analysis**

418 To determine the 99% confidence interval (CI) for the prevalence of ciprofloxacin-resistant  
419 strains, the number of resistant colonies was treated as number of successes and the total number  
420 of picked colonies was treated as the total. To determine the 99% CI for the prevalence of  
421 ciprofloxacin-sensitive strains, the number of colonies of that strain was treated as number of  
422 successes and the total number of picked colonies was treated as the total. Confidence intervals  
423 were calculated using Stata<sup>55</sup>. All t-tests were run using GraphPad  
424 (<http://www.graphpad.com/quickcalcs/ConfInterval1.cfm>).

425 Phylogenetic trees were constructed using MEGA7<sup>56</sup>. Erroneous base coverage graph was  
426 generated using seaborn<sup>57</sup>. *Escherichia coli fumC* alleles were downloaded from Enterobase  
427 MLST allele data. *Escherichia coli fimH* alleles used are publicly available<sup>58</sup>. *Escherichia*  
428 *fergusonii* and *albertii fumC* alleles were downloaded from NCBI. *Klebsiella pneumonia* and  
429 *Enterobacter aerogenes* alleles of *fimH* were downloaded from the PATRIC database  
430 ([www.patricbrc.org](http://www.patricbrc.org)).

#### 431 **ACKNOWLEDGEMENTS**

432 We thank the personnel of KPWARI for assistance in collection of samples, and Dr. Sifang Chen  
433 for proofreading of the manuscript.

434 This work was supported by the National Institutes of Health (grant numbers R01AI106007 and  
435 R42 AI116114-02 [to E. V. S.]

436 E.V.S. conceived the project and designed the experiments. D.K. performed control sample  
437 sequencing and analysis. All other sequencing, validation, and analysis was performed by S.G.S.  
438 V.T. provided study data and samples. M.R. programmed the algorithm; M.R. and S.G.S. tested  
439 and calibrated it. S.G.S. and E.V.S. wrote the manuscript with input from all authors.

#### 440 **REFERENCES**

- 441 1. Heintz-Buschart A, Wilmes P. 2018. Human gut microbiome: Function matters. *Trends*  
442 *Microbiol.* 26(7):563-574.
- 443 2. Caputi V, Giron MC. 2018. Microbiome-gut-brain axis and Toll-like receptors in  
444 Parkinson's Disease. *Int J Mol Sci* 19(6):1689.
- 445 3. Perez-Pardo P, Hartog M, Garssen J, Kraneveld AD. 2017. Microbes tickling your  
446 tummy: the importance of the gut-brain axis in Parkinson's Disease. *Curr Behav*  
447 *Neurosci Rep* 4(4):361-368.
- 448 4. Sanmiguel C, Gupta A, Mayer EA. 2015. Gut Microbiome and obesity: A plausible  
449 explanation for obesity. *Curr Obes Rep* 4(2):250-261.
- 450 5. De la Cuesta-Zuluaga J, Corrales-Agudelo V, Velásquez-Mejía EP, Carmona JA, Abad  
451 JM, Escobar JS. 2018. Gut microbiota is associated with obesity and cardiometabolic  
452 disease in a population in the midst of Westernization. *Sci Rep* 8:11356.
- 453 6. Roszyk E, Puszczewicz M. 2017. Role of human microbiome and selected bacterial  
454 infections in the pathogenesis of rheumatoid arthritis. *Reumatologia* 55(5):242-250.
- 455 7. Bu J, Wang Z. 2018. Cross-talk between gut microbiota and heart via the routes of  
456 metabolite and immunity. *Gastroenterol Res Pract* 2018:6458094.
- 457 8. Dzidic M, Boix-Amorós A, Selma-Royo M, Mira A, Collado MC. 2018. Gut microbiota  
458 and mucosal immunity in the neonate. *Med Sci Basel.* 6(3): E56.

- 459 9. Nunez G. 2017. Linking pathogen virulence, host immunity and the microbiota at the  
460 intestinal barrier. *Keio J Med* 66(1):14.
- 461 10. Tenailon O, Skurnik D, Picard B, Denamur E. 2010. The population genetics of  
462 commensal *Escherichia coli*. *Nature Reviews*. 8(3):207-217.
- 463 11. Gordon DM, O'Brien CL, Pavli P. 2015. *Escherichia coli* diversity in the lower intestinal  
464 tract of humans. *Environ Microbiol Rep*. 7(4):642-648.
- 465 12. Costea PI, Coelho LP, Sunagwa S, Much R, Huerta-Cepas J, Forslund K, Hildebrand F,  
466 Kushugulova A, Zeller G, Bork P. 2017. Subspecies in the global human gut microbiome.  
467 *Mol Sys Biol*. 13(12):960.
- 468 13. Metwaly A, Haller D. 2019. Strain-level diversity in the gut: the *P. copri* case. *Cell Host*  
469 *Microbe*. 25(3):349-350.
- 470 14. Zhang C, Zhao L. 2016. Strain-level dissection of the contribution of the gut microbiome  
471 to human metabolic disease. *Genome Med*. 8(1):41.
- 472 15. Leatham MP, Banerjee S, Autieri SM, Mercado-Lubo R, Conway T, Cohen PS. 2009.  
473 Precolonized human commensal *Escherichia coli* clones serve as a barrier to *E. coli*  
474 O157:H7 growth in the streptomycin-treated mouse intestine. *Infect Immun*. 77(7):2876-  
475 86.
- 476 16. Hecht AL, Casterline BW, Earley ZM, Goo YA, Goodlett DR, Bubeck Wardenburg J.  
477 2016. Clone competition restricts colonization of an enteric pathogen and prevents colitis.  
478 *EMBO Rep*. 17(9):1281-91.
- 479 17. Lam LH, Monack DM. 2014. Intraspecies competition for niches in the distal gut dictate  
480 transmission during persistent *Salmonella* infection. *PLoS Pathog*. 10(12):e1004527.

- 481 18. Sassone-Corsi M, Nuccio SP, Liu H, Hernandez D, Vu CT, Takahashi AA, Edwards RA,  
482 Raffatellu M. 2016. Microcins mediate competition among Enterobacteriaceae in the  
483 inflamed gut. *Nature*. 540(7632):280-283.
- 484 19. Moreno E, Johnson JR, Perez T, Prats G, Kuskowski MA, Andreu A. 2009. Structure and  
485 urovirulence characteristics of the fecal *Escherichia coli* population among healthy  
486 women. *Microbes Infect*. 11(2):274-280.
- 487 20. Bailey JK, Pinyon JL, Anantham S, Hall RM. 2010. Commensal *Escherichia coli* of  
488 healthy humans: a reservoir for antibiotic-resistance determinants. *J Med Microb*.  
489 59:1331-1339.
- 490 21. Gorrie CL, Mirceta M, Wick RR, Judd LM, Wyres KL, Thomson NR, Strugnell RA,  
491 Pratt NF, Garlick JS, Watson KM, Hunter PC, McGloughlin SA, Spelman DW, Jenney  
492 AWJ, Holt KE. 2018. Antimicrobial-resistant *Klebsiella pneumoniae* carriage and  
493 infection in specialized geriatric care wards linked to acquisition in the referring hospital.  
494 *Clin Infect Dis*. 67(2):161-170.
- 495 22. Li H, Zhu J. 2017. Targeted metabolic profiling rapidly differentiates *Escherichia coli*  
496 and *Staphylococcus aureus* at species and strain level. *Rapid Commun Mass Spectrom*.  
497 31(19):1669-1676.
- 498 23. Galardini M, Koumoutsi A, Herrera-Dominguez L, Cordero Varela JA, Telzerow A,  
499 Wagih O, Wartel M, Clermont O, Denamur E, Typas A, Beltrao P. 2017. Phenotype  
500 inference in an *Escherichia coli* strain panel. *Elife*. 6:e31035.
- 501 24. Bevan ER, McNally A, Thomas CM, Piddock LJV, Hawkey PM. 2018. Acquisition and  
502 loss of CTX-M-producing and non-producing *Escherichia coli* in the fecal microbiome of  
503 travelers to South Asia. *mBio*. 9(6):e02408-18.

- 504 25. Robin F<sup>1,2</sup>, Beyrouthy R<sup>3,2</sup>, Bonacorsi S<sup>4,5</sup>, Aissa N<sup>6</sup>, Bret L<sup>7</sup>, Brieu N<sup>8</sup>, Cattoir V<sup>9</sup>,  
505 Chapuis A<sup>10</sup>, Chardon H<sup>8</sup>, Degand N<sup>11</sup>, Doucet-Populaire F<sup>12</sup>, Dubois V<sup>13</sup>, Fortineau  
506 N<sup>14</sup>, Grillon A<sup>15</sup>, Lanotte P<sup>16</sup>, Leyssene D<sup>17</sup>, Patry I<sup>18</sup>, Podglajen I<sup>19</sup>, Recule C<sup>20</sup>,  
507 Ros A<sup>21</sup>, Colomb-Cotin M<sup>22</sup>, Ponties V<sup>22</sup>, Ploy MC<sup>23</sup>, Bonnet R<sup>3,2</sup>. 2017. Inventory  
508 of extended-spectrum- $\beta$ -lactamase-producing Enterobacteriaceae in France as assessed  
509 by a multicenter study. *Antimicrob Agents Chemother.* 61(3): pii: e01911-16.
- 510 26. Gupta M, Didwal G, Bansal S, Kaushal K, Batra N, Gautam V, Ray P. 2019. Antibiotic-  
511 resistant Enterobacteriaceae in healthy gut flora: A report from north Indian semiurban  
512 community. *Indian J Med Res.* 149(2):276-280.
- 513 27. Johnson JR, Johnston B, Clabots C, Kuskowski MA, Castanheira M. 2010. *Escherichia*  
514 *coli* sequence type ST131 as the major cause of serious multidrug-resistant *E. coli*  
515 infections in the United States. *Clin Infect Dis.* 51(3):286-294.
- 516 28. Johnson JR, Tchesnokova V, Johnston B, Clabots C, Roberts PL, Billig M, Riddell K,  
517 Rogers P, Qin X, Butler-Wu S, Price LB, Aziz M, Nicolas-Chanoine MH, Debroy C,  
518 Robicsek A, Hansen G, Urban C, Platell J, Trott DJ, Zhanel G, Weissman SJ, Cookson  
519 BT, Fang FC, Limaye AP, Scholes D, Chattopadhyay S, Hooper DC, Sokurenko EV.  
520 2013. Abrupt emergence of a single dominant multidrug-resistant clone of *Escherichia*  
521 *coli*. *J Infect Dis.* 207(6):919-928.
- 522 29. Burgess MJ, Johnson JR, Porter SB, Johnston B, Clabots C, Lahr BD, Uhl JR, Banerjee  
523 R. 2015. Long-term care facilities are reservoirs for antimicrobial-resistant sequence type  
524 131 *Escherichia coli*. *Open Forum Infect Dis.* 2(1):ofv011.



- 525 30. Johnson JR, Porter S, Thuras P, Castanheira M. 2017. The pandemic *H30* subclone of  
526 sequence type 131 (ST131) as the leading cause of multidrug-resistant *Escherichia coli*  
527 infections in the United States (2011–2012). *Open Forum Infect Dis.* 4(2):ofx089.
- 528 31. Tchesnokova V, Rechkina E, Chan D, Haile HG, Larson L, Schroeder DW, Solyanik T,  
529 Shibuya S, Hansen KE, Ralston JD, Riddell K, Scholes D, Sokurenko EV. 2019.  
530 Pandemic uropathogenic fluoroquinolone-resistant *Escherichia coli* have enhanced  
531 ability to persist in the gut and cause bacteriuria in healthy women. *Clin Inf Dis.*  
532 (accepted)
- 533 32. Ong SH, Kukkillaya VU, Wilm A, Lay C, Ho EX, Low L, Hibberd ML, Nagarajan N.  
534 2013. Species Identification and Profiling of Complex Microbial Communities Using  
535 Shotgun Illumina Sequencing of 16S rRNA Amplicon Sequences. Parkinson J, ed. *PLoS*  
536 *One* 8(4):e60811.
- 537 33. Chen W, Zhang CK, Cheng Y, Zhang S, Zhao H. 2013. A Comparison of Methods for  
538 Clustering 16S rRNA Sequences into OTUs. Casiraghi M, ed. *PLoS One.* 8(8):e70837.
- 539 34. Zolfo M, Tett A, Jousson O, Donati C, Segata N. 2017. MetaMLST: multi-locus clone-  
540 level bacterial typing from metagenomic samples. *Nucleic Acids Res.* 45(2):e7.
- 541 35. Scholz M, Ward DV, Pasolli E, Tolio T, Zolfo M, Asincar F, Truong DT, Tett A,  
542 Morrow AL, Segata N. 2016. Clone-level microbial epidemiology and population  
543 genomics from shotgun metagenomics. *Nature Methods.* 13:435-438.
- 544 36. Nayfach S, Rodriguez-Mueller B, Garud N, Pollard KS. 2016. An integrated  
545 metagenomics pipeline for strain profiling reveals novel patterns of bacterial transmission  
546 and biogeography. *Genome Res.* 26(11):1612-1625.

- 547 37. Fischer M, Strauch B, Renard BY. 2017. Abundance estimation and differential testing  
548 on strain level in metagenomics data. *Bioinformatics*. 33(14):i124-i132.
- 549 38. Weissman SJ, Johnson JR, Tchesnokova V, Billig M, Dykhuizen D, Riddell K, Rogers P,  
550 Qin X, Butler-Wu S, Cookson BT, Fang FC, Scholes D, Chattopadhyay S, Sokurenko  
551 EV. 2012. High-resolution two-locus clonal typing of extraintestinal pathogenic  
552 *Escherichia coli*. *Appl Environ Microbiol*. 78(5):1353-1360.
- 553 39. National Center for Emerging and Zoonotic Infectious Diseases, Division of Healthcare  
554 Quality Promotion. “Biggest Threats and Data”. Centers for Disease Control and  
555 Prevention. [www.cdc.gov/drugresistance/biggest\\_threats.html](http://www.cdc.gov/drugresistance/biggest_threats.html)
- 556 40. Eckburg PB, Bik EM, Bernstein CN, Purdom E, Dethlefsen L, Sargent M, Gill SR,  
557 Nelson KE, Relman DA. 2005. Diversity of the human intestinal microbial flora. *Science*.  
558 308(5728):1635-8.
- 559 41. Anderson MA, Whitlock JE, Harwood VJ. 2006. Diversity and distribution of  
560 *Escherichia coli* genotypes and antibiotic resistance phenotypes in feces of humans,  
561 cattle, and horses. *Appl Environ Microbiol*. 72(11):6914-22.
- 562 42. Richter TKS, Hazen TH, Lam D, Coles CL, Seidman JC, You Y, Silbergeld EK, Fraser  
563 CM, Rasko DA. 2018. Temporal variability of *Escherichia coli* diversity in the  
564 gastrointestinal tracts of Tanzanian children with and without exposure to antibiotics.  
565 *mSphere*. 3(6):e00558-18.
- 566 43. Diard M, Garry L, Selva M, Mosser T, Denamur E, Matic I. 2010. Pathogenicity-  
567 associated islands in extraintestinal pathogenic *Escherichia coli* are fitness elements  
568 involved in intestinal colonization. *J Bacteriol*. 192(19):4885-93.

- 569 44. Le Gall T, Clermont O, Gouriou S, Picard B, Nassif X, Denamur E, Tenailon O. 2007.  
570 Extraintestinal virulence is a coincidental by-product of commensalism in B2  
571 phylogenetic group *Escherichia coli* strains. *Mol Biol Evol.* 24(11):2373-84.
- 572 45. Nielsen KL, Stegger M, Godfrey PA, Feldgarden M, Andersen PS, Frimodt-Moller N.  
573 2016. Adaptation of *Escherichia coli* traversing from the faecal environment to the  
574 urinary tract. *Int J Med Microbiol.* 306(8):595-603.
- 575 46. Moreno E, Andreu A, Perez T, Sabate M, Johnson JR, Prats G. 2005. Relationship  
576 between *Escherichia coli* strains causing urinary tract infection in women and the  
577 dominant faecal flora of the same hosts. *Epidemiol Infect.* 134:1015-1023.
- 578 47. Smati M, Clermont O, Le Gal F, Schichmanoff O, Jauréguy F, Eddi A, Denamur E,  
579 Picard B. 2013. Real-time PCR for quantitative analysis of human commensal  
580 *Escherichia coli* populations reveals a high frequency of subdominant phylogroups. *Appl*  
581 *Environ Microbiol.* 79(16):5005-12.
- 582 48. Krueger F. 2016. Trim Galore. <https://github.com/FelixKrueger/TrimGalore>. [Online;  
583 accessed 2018-11-28]
- 584 49. Philip TLC, Clausen F, Aarestrup M, Lund O. 2018. Rapid and precise alignment of raw  
585 reads against redundant databases with KMA", *BMC Bioinformatics.* 19:307.
- 586 50. Li H. 2018. Minimap2: pairwise alignment for nucleotide sequences. *Bioinformatics.*  
587 34:3094-3100.
- 588 51. Li H, Handsaker B, Wysoker A, Fennell T, Ruan J, Homer N, Marth G, Abecasis G,  
589 Durbin R, 1000 Genome Project Data Processing Subgroup. 2009. The Sequence  
590 alignment/map (SAM) format and SAMtools, *Bioinformatics.* 25(16) 2078-9.

- 591 52. Tchesnokova V, Avagyan H, Billig M, Chattopadhyay S, Aprikian P, Chan D, Pseunova  
592 J, Rechkina E, Riddell K, Scholes D, Fang FC, Johnson JR, Sokurenko EV. 2016. A  
593 Novel 7-Single Nucleotide Polymorphism-Based Clonotyping Test Allows Rapid  
594 Prediction of Antimicrobial Susceptibility of Extraintestinal *Escherichia coli* Directly  
595 From Urine Specimens. *Open Forum Infect Dis* 3(1):ofw002.
- 596 53. StataCorp. 2019. Stata Statistical Software: Release 16. College Station, TX: StataCorp  
597 LLC.
- 598 54. Kumar S, Stecher G, Tamura K. 2016. MEGA7: Molecular Evolutionary Genetics  
599 Analysis version 7.0. *Mol Biol Evol.* 33(7):1870-1874.
- 600 55. Waskom M, Botvinnik O, O’Kane D, Hobson P, Lukauskas S, Gemperline DC,  
601 Augspurger T, Halchenko Y, Cole JB, Warmenhoven J, de Ruiter J, Pye C, Hoyer S,  
602 Vanderplas J, Villalba S, Kunter G, Quintero E, Bachant P, Martin M, Meyer K, Miles A,  
603 Ram Y, Yarkoni T, Williams ML, Evans C, Fitzgerald C, Fonnesback C, Lee A, Qalieh  
604 A. 2017. Seaborn: statistical data visualization. <http://seaborn.pydata.org>. [Online;  
605 accessed 2019-02-05].
- 606 56. Roer L, Tchesnokova V, Allesoe R, Muradova M, Chattopadhyay S, Ahrenfeldt J,  
607 Thomsen MCF, Lund O, Hansen F, Hammerum AM, Sokurenko E, Hasman H. 2017.  
608 Development of a Web Tool for *Escherichia coli* Subtyping Based on *fimH* Alleles. *J*  
609 *Clin Microbiol.* 55:2538–2543.

## 610 **FIGURE LEGENDS**

611 **Figure 1. Congruency of *fumC* and *fimH* allele counts in fecal and urine samples.** Size of  
612 bubbles corresponds to number of samples with designated *fumC/fimH* allele counts (i.e. 1

613 sample with one *fumC* allele and three *fimH* alleles). Linear fit with Pearson square correlation  
614 index shown.

615 **Figure 2. Validation of predicted H30 allele prevalence.** PLAP-predicted prevalence of H30  
616 alleles vs actual H30 load in H30-containing fecal samples. Prevalence of predicted *fumC40* (A)  
617 and predicted *fimH30* (B). Predicted prevalence of *fumC40* and *fimH30* is expressed as  
618 percentage of all *E. coli* in each sample. Experimentally confirmed H30 load is expressed as  
619 percent of H30 (ciprofloxacin-resistant) single colonies to all plated *E. coli* single colonies in  
620 percent. At least 130 colonies were tested per sample. Outliers, marked in open circles, were  
621 outside the 99% confidence interval of the number of colonies tested.

622 **Figure 3. Validation of predicted *fumC/fimH* allele prevalence. A.** PLAP-predicted vs  
623 experimental within-sample *fumC/fimH* allele prevalence in 18 samples. Experimental allele  
624 prevalence was determined by CH typing of at least 40 single bacterial colonies per sample.  
625 Outliers (open circles) were outside the 99% confidence interval of the number of colonies  
626 sampled. **B.** Predicted prevalence of *fumC* vs *fimH* alleles from the same CH type in 11 samples  
627 where no sharing of alleles between strains was present.

628 **Figure 4.** Difference in predicted prevalence between *fumC* and *fimH* alleles from the same *E.*  
629 *coli* strain. Deviation in absolute numbers is shown on the top. Deviation as a percentage of the  
630 prevalence of the allele is shown on the bottom. Open circles indicate *fimH* data points. Shaded  
631 circles indicate *fumC* data points. Trend lines and equations were used to determine intervals for  
632 matching (i.e. belonging to the same CH type) *fumC* and *fimH* alleles.

633 **Figure 5.** Representative examples of each sample category defined by within-sample  
634 breakdown of prevalence for *fumC* and *fimH* alleles. Number of fecal and urine samples  
635 belonging in each category is listed below.

636 **Figure 6. Diversity of *E. coli* in individual fecal/urine samples.** *H30* content was determined  
637 by PLAP and/or culturing.

638 **Figure 7. Counts of *E. coli* strains in fecal and urine samples.** Number of strains detected by  
639 PLAP in (A) first fecal vs urine, (B) second fecal vs urine, and (C) first fecal vs second fecal  
640 samples. Each bubble indicates participants with the corresponding number of *E. coli* strains in  
641 the designated sample. The bubble size indicates number of participants with the determined  
642 number of strains. Linear fit with Pearson square correlation index shown.

643 **Figure 8. Persistence of *E. coli* strains in fecal samples.** (A) Prevalence of criterion fecal  
644 strains in first vs second fecal samples. White data points indicate *H30* strains while shaded data  
645 points indicate non-*H30* strains. Circled cluster represents 4 strains present at 100% prevalence  
646 in both samples. Dotted lines indicate the mean prevalence for strains in first and second fecal  
647 samples. Distribution of prevalences in both first and second fecal samples is not significantly  
648 different from random (t-test,  $p > 0.05$ ). (B) Prevalence of non-criterion fecal strains in first vs  
649 second fecal samples. Dotted lines indicate the mean prevalence for transient strains in first and  
650 second fecal samples. Transient strains are defined as strains that are present in only one of the  
651 two fecal samples from the same participant. Distribution of prevalences in both first and second  
652 fecal samples is significantly skewed towards lower prevalences (t-test,  $p < 0.01$ ).

653 **Supplemental Figure 1.** Coverage of erroneous bases in *H30*-only, ST101-only, and mix sample  
654 sequencing. Coverage is expressed in percentage of total reads aligned to each gene.

655 **Supplemental Figure 2.** Correlation between input and PLAP-derived (deep seq) prevalences of  
656 *fumC* and *fimH* alleles of *H30* and *ST101* in 1:1, 1:4, and 1:100 mixes.

657 **Supplemental Figure 3.** Phylogenetic relationships between predicted novel *fumC* alleles and  
658 known *E. coli fumC* alleles. *Escherichia fergusonii* and *albertii fumC* alleles also presented for  
659 outgroup reference. Alleles not labelled with a species are known *E. coli* alleles or putative novel  
660 alleles. Alleles found in the sample as the novel allele are highlighted in the same color as the  
661 novel allele to show distance between predicted novel alleles and other *fumC* alleles present in  
662 the sample. Alleles present in multiple different samples are marked with the appropriate colors  
663 next to the allele name.

664 **Supplemental Figure 4.** Phylogenetic relationships between predicted novel *fimH* alleles and  
665 known *E. coli fimH* alleles. *Klebsiella pneumoniae* and *Enterobacter aerogenes fimH* alleles also  
666 presented for outgroup reference. Alleles not labelled with a species are known *E. coli* alleles or  
667 putative novel alleles. Alleles found in the sample as the novel allele are highlighted in the same  
668 color as the novel allele to show distance between predicted novel alleles and other *fimH* alleles  
669 present in the sample. Alleles present in multiple different samples are marked with the  
670 appropriate colors next to the allele name.

671 **Supplemental Figure 5. A.** Comparison of actual *H30* load in *H30*-containing fecal samples to  
672 PLAP-predicted *fumC*-40/*fimH*-30 prevalences with minority rule correction (i.e. the smaller  
673 prevalence of the two was used). Prevalence of *fumC*-40/*fimH*-30 is expressed as percentage of  
674 all *E. coli* in each sample. *H30* load is expressed as ratio of *H30* (ciprofloxacin-resistant) single  
675 colonies to all plated *E. coli* single colonies in percent. **B.** PLAP-predicted allele prevalence  
676 (with minority rule correction) compared to experimental allele prevalence as determined by  
677 surveying at least 40 single colonies per sample.

678 **Supplemental Figure 6.** Putative rare novel *fumC* alleles identified by lowering the error  
679 threshold from 0.8% to 0.5%, marked in open shapes. Known alleles from the same sample as  
680 the rare novel allele are marked in filled-in shapes of the same type and color. FumC-40 was  
681 present in 3 different samples and therefore is marked by 3 different shapes.

682 **Supplemental Figure 7.** Putative rare novel *fimH* alleles identified by lowering the error  
683 threshold from 0.8% to 0.5%, marked in open shapes. Known alleles from the same sample as  
684 the rare novel allele are marked in filled-in shapes of the same type and color. FimH-30 was  
685 present in 3 different samples and therefore is marked by 3 different shapes.

686 **Supplemental Figure 8.** Sampling of volunteer sample sets. Length of segments is proportional  
687 to number of days between samples.

688 **Supplemental Figure 9. PLAP algorithm workflow.** Algorithms previously developed by  
689 other groups include Trim-Galore, KMA, Minimap2. Not pictured but used during windowed  
690 coverage checks is SAMtools.

691



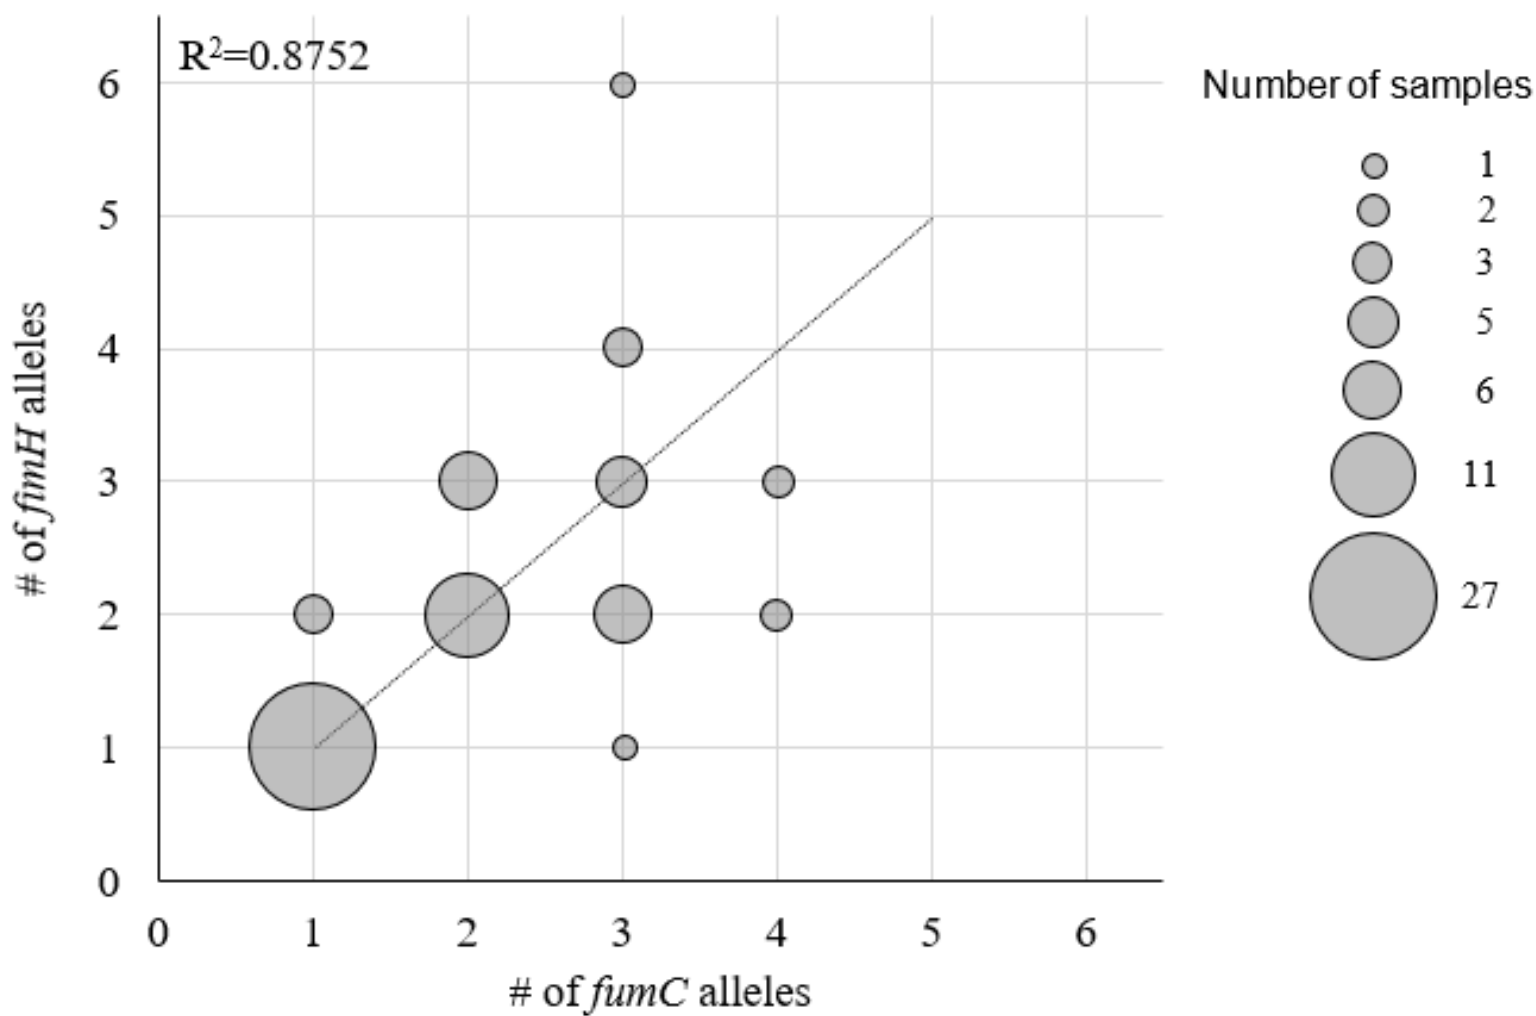

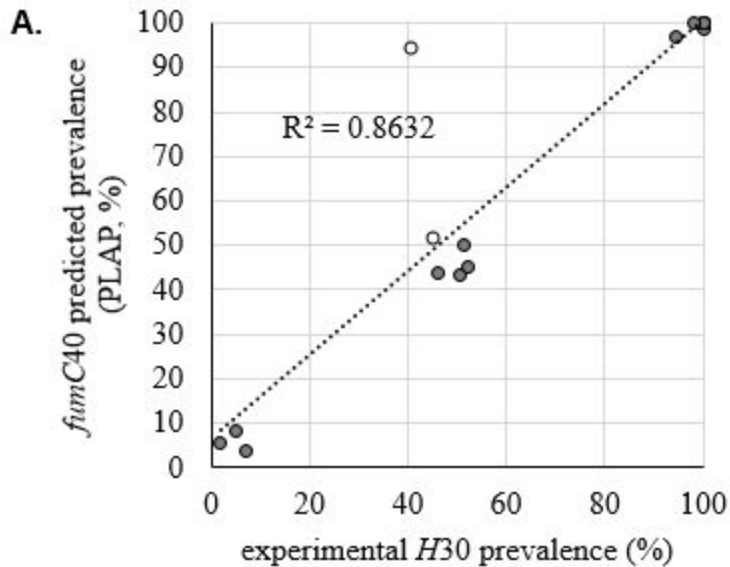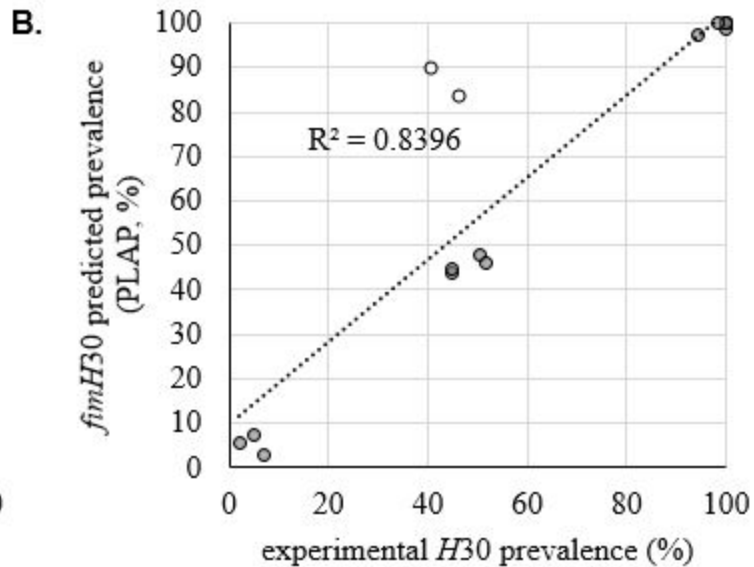

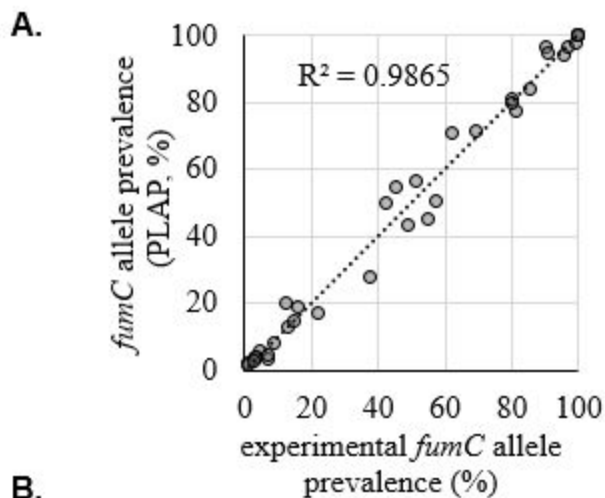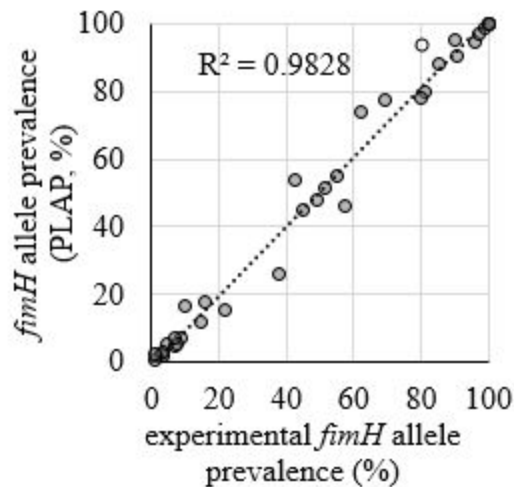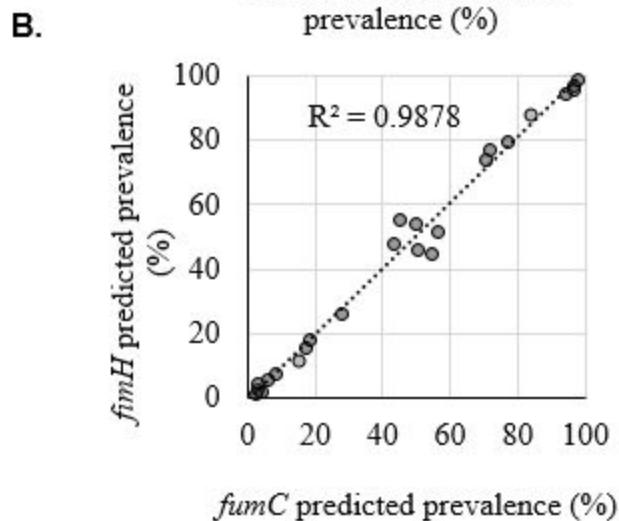

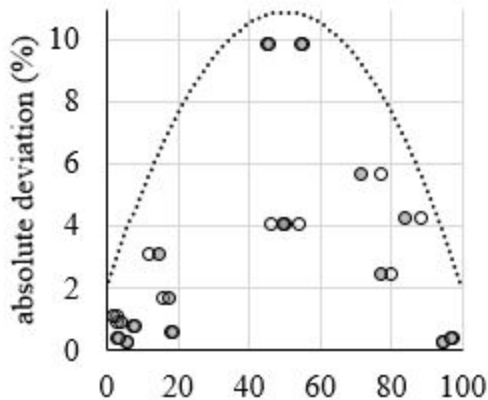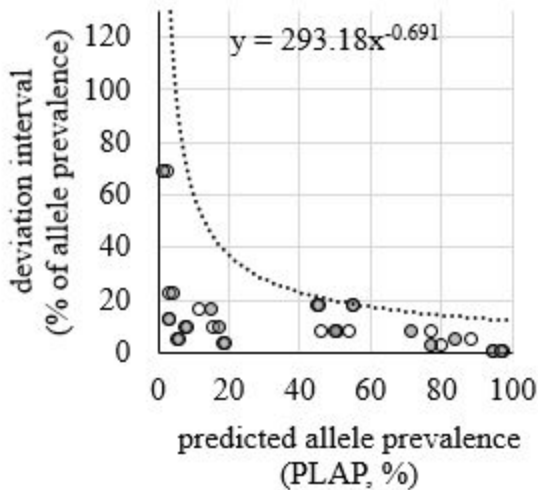

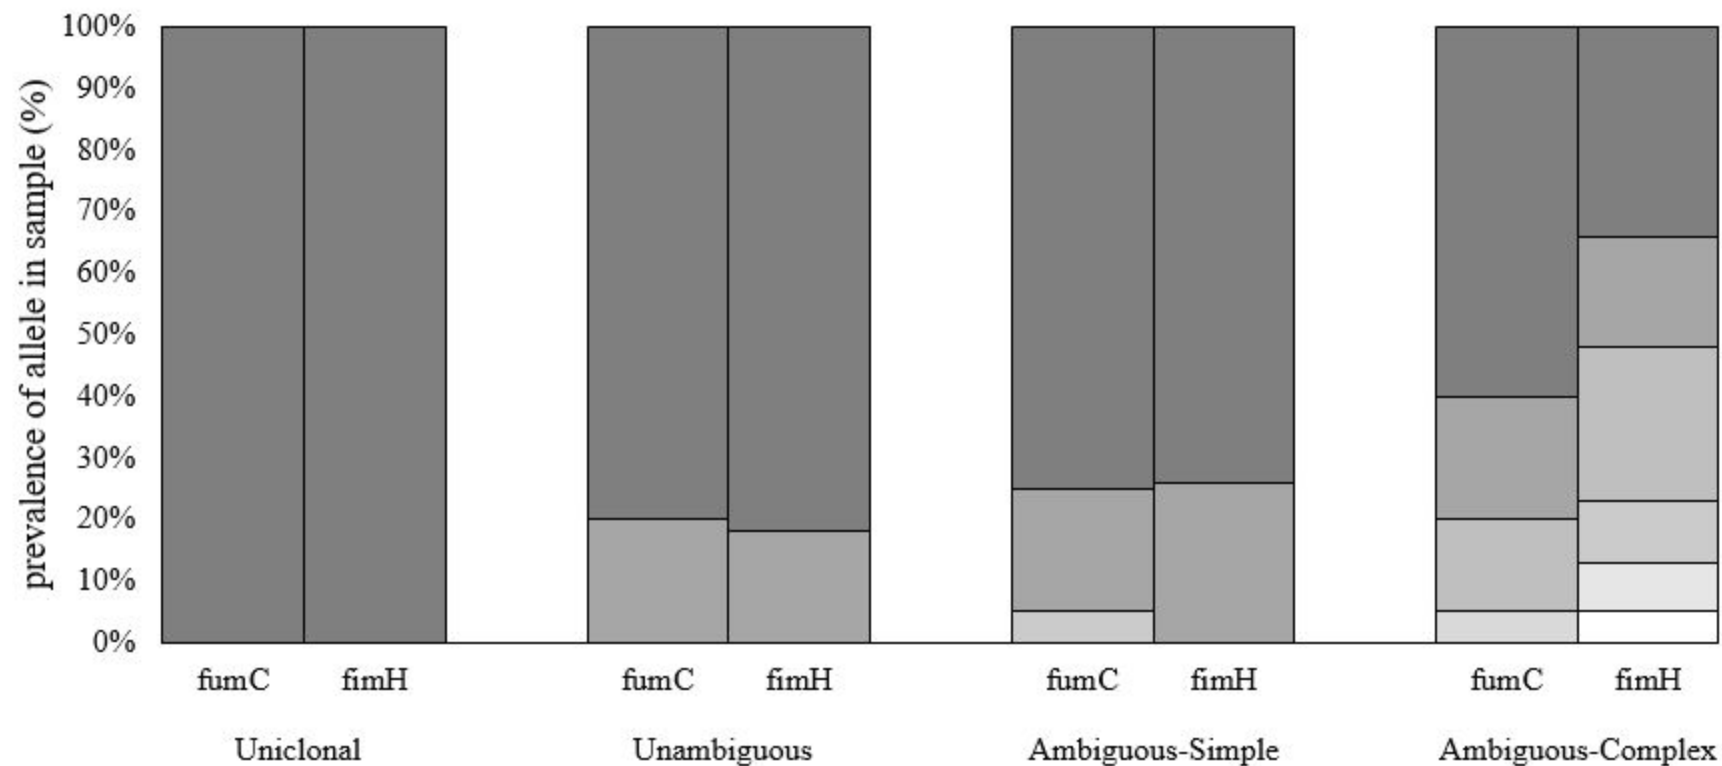

|               |           |           |           |           |
|---------------|-----------|-----------|-----------|-----------|
| Fecal samples | 14        | 10        | 9         | 10        |
| Urine samples | 13        | 2         | 6         | 3         |
| <b>Total</b>  | <b>27</b> | <b>12</b> | <b>15</b> | <b>13</b> |

# of strains in sample

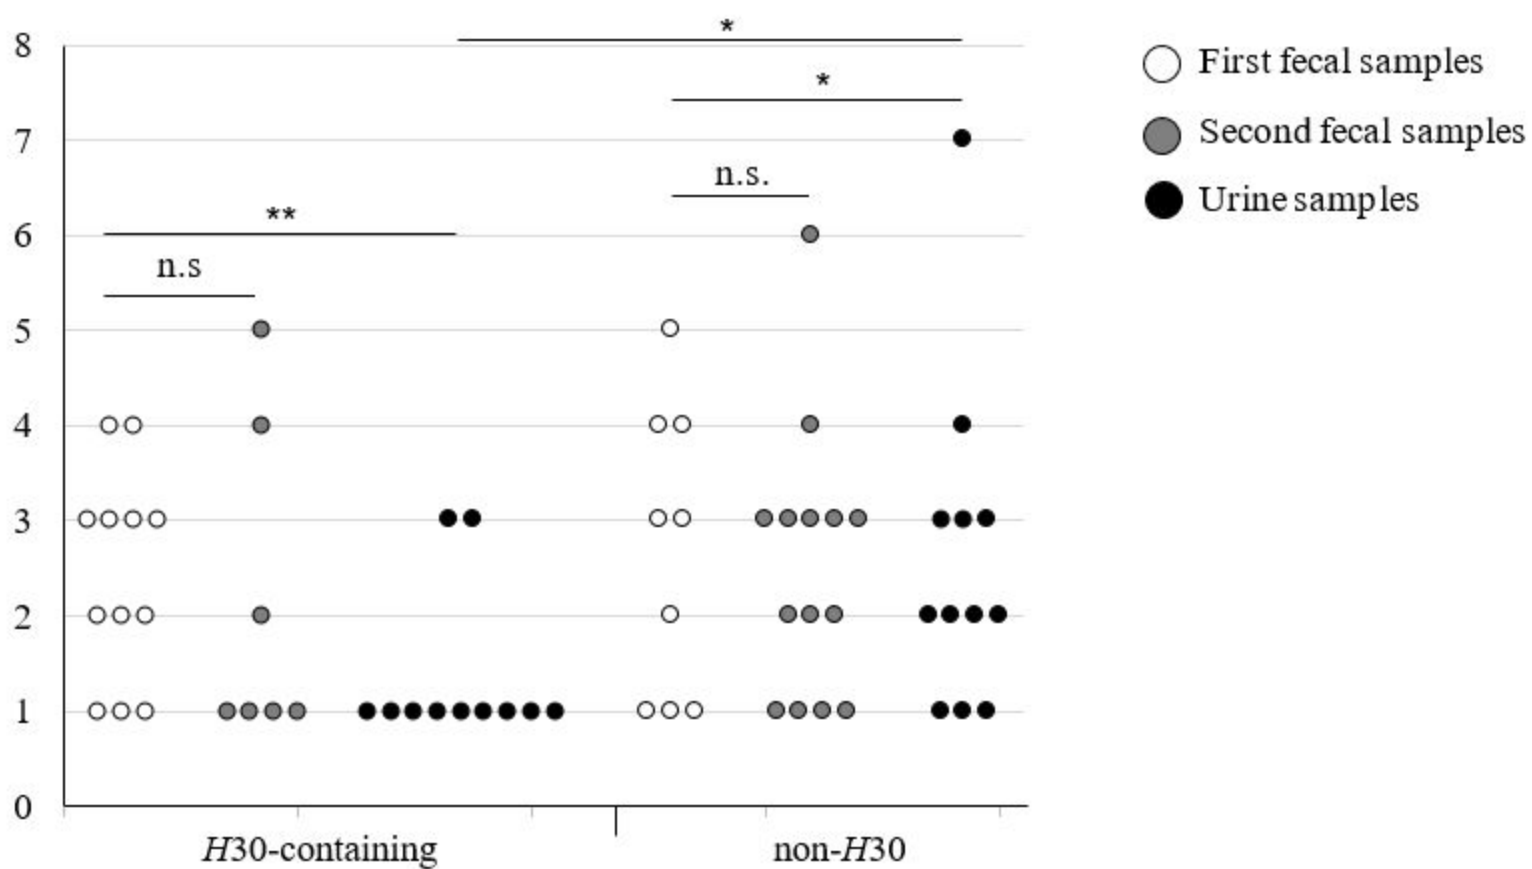

**A.**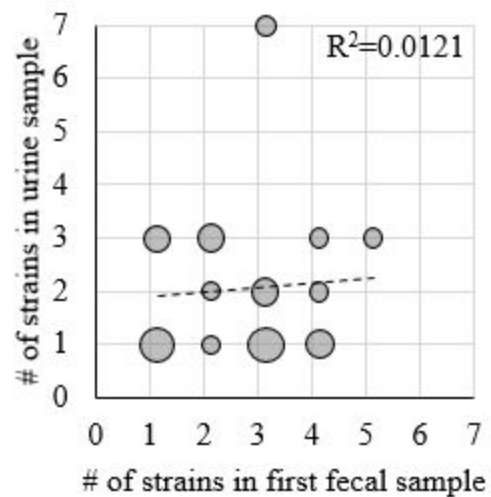**B.**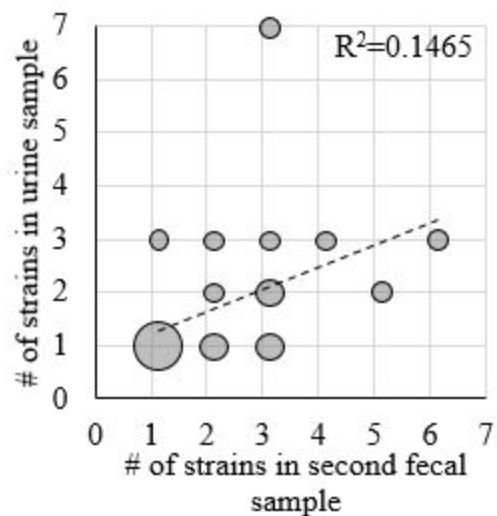**C.**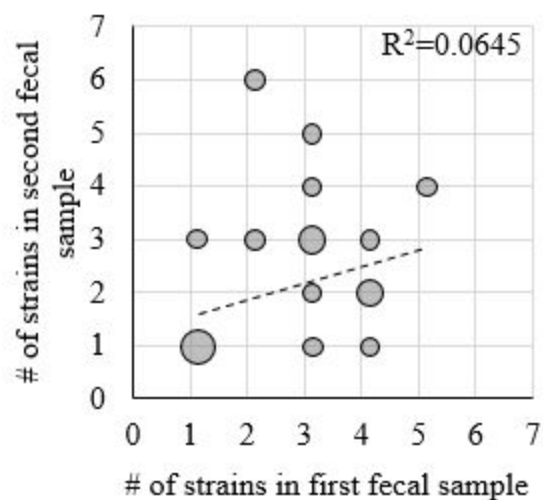

Number of samples

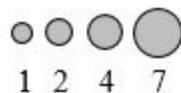

**A.**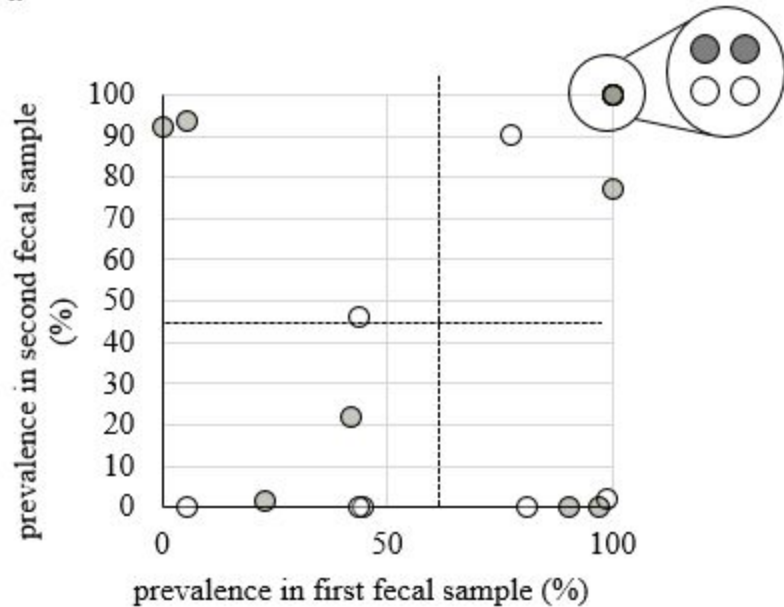**B.**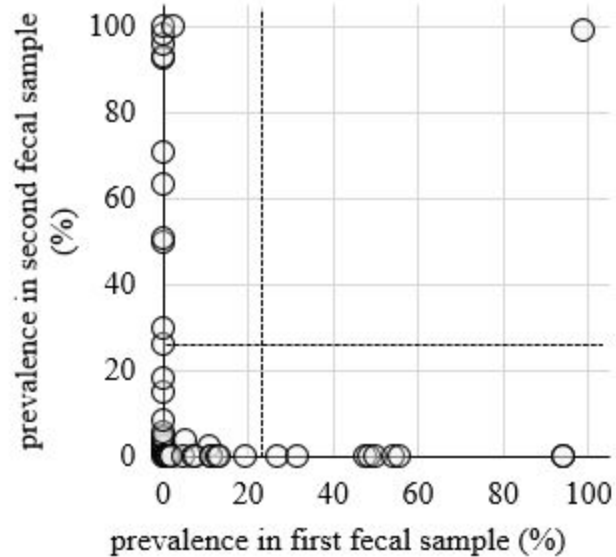

Source: https://www.biorxiv.org/content/10.1101/735233v1.full.pdf
